# Supplementary material
Source: PubMed Central journal article supplement (PMC3507370)
Supplement: ASN.2012060572_ASN2012060572SupplementaryData.pdf [file ASN.2012060572_ASN2012060572SupplementaryData.pdf]

## Figure S1

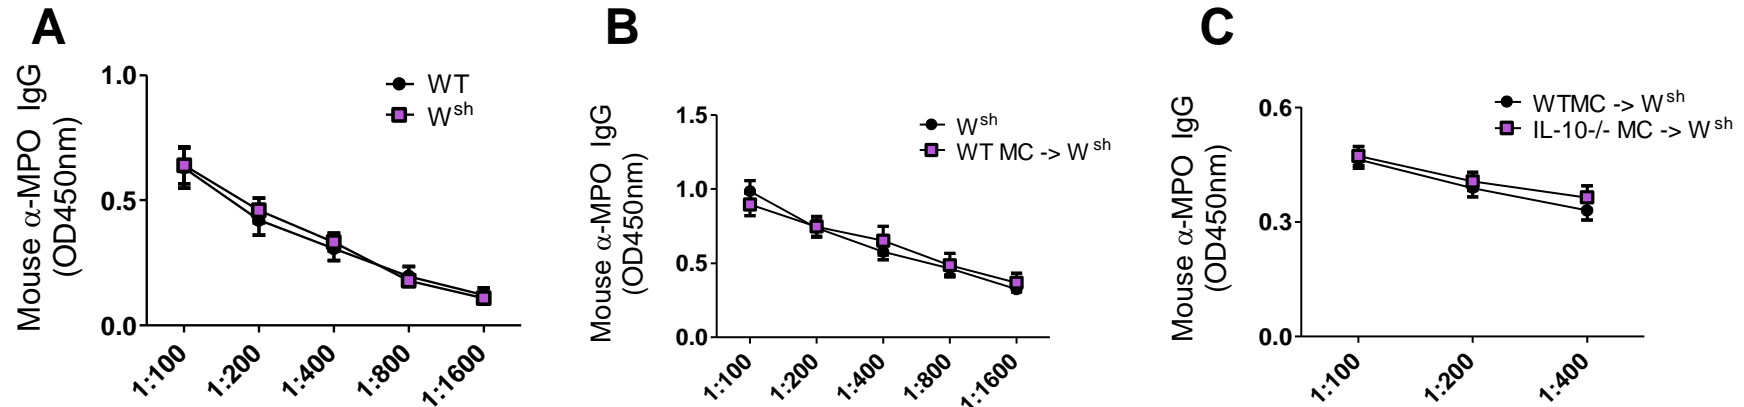

**Figure S1. Similar anti-MPO antibody titres were measured in WT and  $Kit^{W-sh/W-sh}$  mice with autoimmune anti-MPO glomerulonephritis.**

(A) MPO immunized C57BL/6 WT mice (n=8) and MPO immunized  $Kit^{W-sh/W-sh}$  mice (n=8) both developed comparable levels of anti-MPO IgG titres. (B) No difference in ANCA was observed between MPO immunized  $Kit^{W-sh/W-sh}$  mice (n=9) and WT mast cell reconstituted  $Kit^{W-sh/W-sh}$  mice (n=10). Titres of ANCA were not statistically significant between  $Kit^{W-sh/W-sh}$  mice reconstituted with either WT mast cells (n=10) or IL-10 $^{-/-}$  mast cells (n=10). All data representative of two independent experiments with error bars depicting mean  $\pm$  SEM.

**Figure S2**

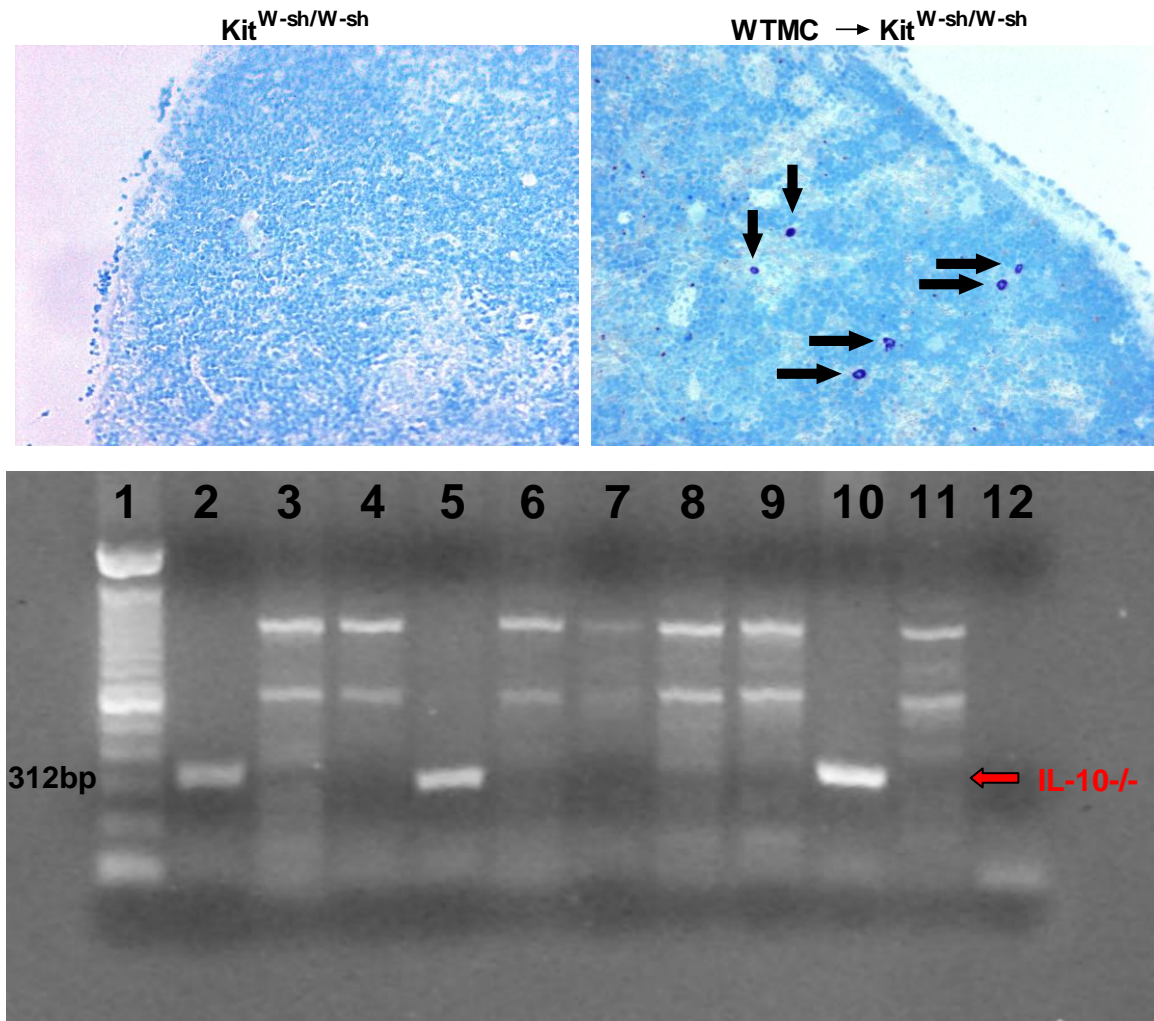

**Fig S2. Confirmation of MC reconstituted  $\text{Kit}^{\text{W-sh/W-sh}}$  mice.**

(A) Twelve weeks after intravenous transfer of mast cells into  $\text{Kit}^{\text{W-sh/W-sh}}$  mice, lymph nodes were harvested and stained using toluidine blue to verify repopulation of mast cells (i) No mast cells were observed in non-reconstituted  $\text{Kit}^{\text{W-sh/W-sh}}$  mice ( $n=3$ ), (ii) while WT mast cells were observed to be repopulated in WT mast cell  $\rightarrow \text{Kit}^{\text{W-sh/W-sh}}$  mice ( $n=3$ ) and similar to WT C57BL/6 mice ( $n=3$ ; data not shown) (B) Following completion of experimental autoimmune MPO-ANCA associated GN in WT mast cell reconstituted  $\text{Kit}^{\text{W-sh/W-sh}}$  mice and  $\text{IL-10}^{-/-}$  mast cell reconstituted  $\text{Kit}^{\text{W-sh/W-sh}}$  mice. Splenic mast cells from all  $\text{IL-10}^{-/-}$  reconstituted mice (lanes 2 and 5) as well as 3 control WT mast cell reconstituted mice (lanes 4 and 6).

## Figure S3

A

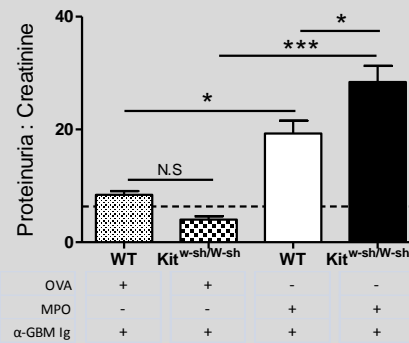

**Figure S3. Subnephritogenic dose of anti-GBM antibody without MPO autoimmunity does not contribute to renal injury**

(A) Ovalbumin immunized WT and Kit<sup>w-sh/w-sh</sup> mice (n = 3-4) given anti-GBM antibody did not develop renal injury and proteinuria was similar to naive uninjected WT mice (dotted line). Results were significantly less than mice immunized with MPO then given anti-GBM antibody. Error bars denote mean ± SEM and statistical analysis by one way ANOVA, \*P<0.05 and \*\*\*P<0.001.

**Figure S4**

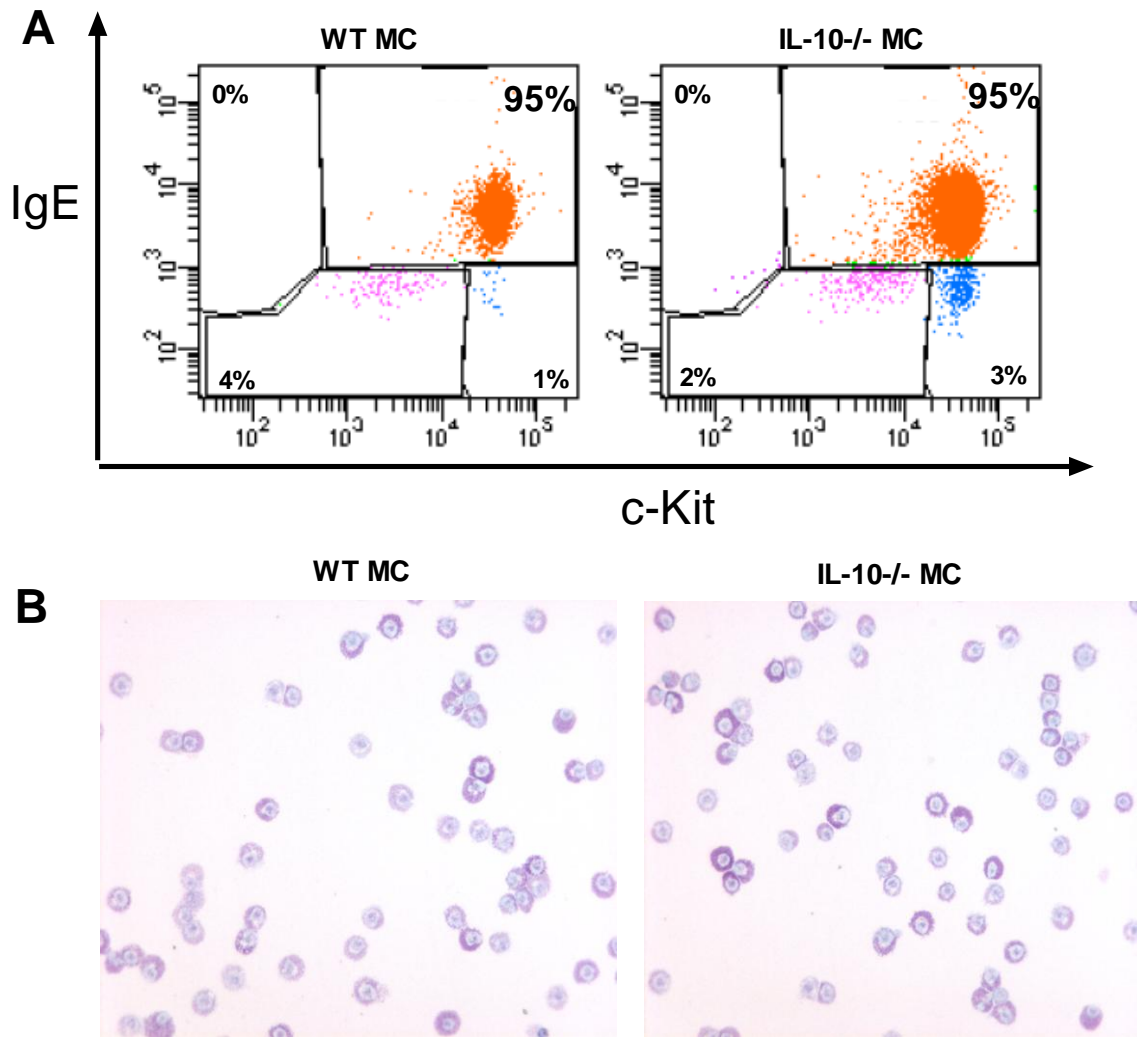

**Figure S4. Reconstitution of the mast cell population in  $\text{Kit}^{\text{W-sh/W-sh}}$  mice.**

Bone marrow derived mast cells obtained from femurs of WT mice or IL-10<sup>-/-</sup> mice (n=2-3) were cultured *in vitro*. Purity of mast cells was assessed via two independent methods. (A) Firstly, by staining cells for IgE bound FcεRII and c-Kit ligand. (B) Secondly, mast cells were histologically stained using toluidine blue and stains mast cells purple. MCs were injected intravenously into  $\text{Kit}^{\text{W-sh/W-sh}}$  mice when purity was greater than 95%.
